## **Among family variation in survival and gene expression uncovers adaptive genetic variation in a threatened fish**

Avril M. Harder<sup>1\*</sup>, Janna R. Willoughby<sup>2,3</sup>, William R. Ardren<sup>4</sup>, Mark R. Christie<sup>1,2</sup>

1. Department of Biological Sciences, Purdue University, 915 W. State St., West Lafayette, IN 47907, USA

2. Department of Forestry and Natural Resources, Purdue University, 715 W. State St., West Lafayette, IN 47907, USA

3. School of Forestry and Wildlife Sciences, Auburn University, 602 Duncan Dr., Auburn, AL 36849, USA

4. U. S. Fish and Wildlife Service, Western New England Complex, 11 Lincoln St., Essex Junction, VT 05452, USA

\*corresponding author

## 1 **Abstract**

2 Variation in among-family transcriptional responses to different environmental conditions can  
3 help to identify adaptive genetic variation, even prior to a selective event. Coupling differential  
4 gene expression with formal survival analyses allows for the disentanglement of treatment  
5 effects, required for understanding how individuals plastically respond to environmental  
6 stressors, from the adaptive genetic variation responsible for among-family variation in survival  
7 and gene expression. We applied this experimental design to investigate responses to an  
8 emerging conservation issue, thiamine (vitamin B<sub>1</sub>) deficiency, in a threatened population of  
9 Atlantic salmon (*Salmo salar*). Thiamine is an essential vitamin that is increasingly limited in  
10 many ecosystems. In Lake Champlain, Atlantic salmon cannot acquire thiamine in sufficient  
11 quantities to support natural reproduction; fertilized eggs must be reared in hatcheries and treated  
12 with supplemental thiamine. We evaluated transcriptional responses (RNA-seq) to thiamine  
13 treatment across families and found 3,616 genes differentially expressed between control (no  
14 supplemental thiamine) and treatment individuals. Fewer genes changed expression additively  
15 (i.e., equally among families) than non-additively (i.e., family-by-treatment effects) in response  
16 to thiamine. Differentially expressed genes were related to known physiological effects of  
17 thiamine deficiency, including oxidative stress, cardiovascular irregularities, and neurological  
18 abnormalities. We also identified 1,446 putatively adaptive genes that were strongly associated  
19 with among-family survival in the absence of thiamine treatment, many of which related to  
20 neurogenesis and visual perception. Our results highlight the utility of coupling RNA-seq with  
21 formal survival analyses to identify candidate genes that underlie the among-family variation in  
22 survival required for an adaptive response to natural selection.

23 **Keywords:** Atlantic salmon, contemporary evolution, RNA-seq, thiamine, transcriptomics

## 24 **Introduction**

25 Understanding if and how species can adapt to rapidly changing environmental conditions is a  
26 primary goal of modern conservation biology (Bernatchez, 2016; Stockwell, Hendry, &  
27 Kinnison, 2003). One of the key challenges in meeting this goal is uncovering the adaptive  
28 genetic variation required for a response to selection and deciphering whether this adaptive  
29 genetic variation will be sufficient to respond to anthropogenically-induced agents of selection.  
30 Contemporary genomic approaches have revolutionized our ability to identify regions of the  
31 genome responding to selection, even over relatively short time periods (Franks, Kane, O'Hara,  
32 Tittes, & Rest, 2016; van't Hof et al., 2016; Willoughby, Harder, Tennessen, Scribner, &  
33 Christie, 2018). However, such methods often lack sufficient power to detect rapid responses to  
34 selection, especially when examining polygenic traits shaped by large numbers of loci of small  
35 effect (Pritchard, Pickrell, & Coop, 2010; Wellenreuther & Hansson, 2016). Furthermore,  
36 genomic approaches can only provide insights after selection has already occurred; thus their  
37 utility for predicting responses to selection requires appropriate study systems or long-term  
38 experimental breeding designs. One alternative to these approaches is experimental  
39 transcriptomics. By carefully designing treatments, rearing F1 offspring in a common  
40 environment, and deeply sequencing mRNA, it is possible to uncover an adaptive, genetic  
41 response to selection (Christie, Marine, Fox, French, & Blouin, 2016; Passow et al., 2017; Uusi-  
42 Heikkilä, Sävilammi, Leder, Arlinghaus, & Primmer, 2017). Coupling family-level replication  
43 and formal survival analyses allows for the disentanglement of treatment effects, required for  
44 understanding how individuals plastically respond to environmental stressors, and among-family  
45 variation in survival and gene expression. Here, we apply these techniques to a threatened fish

46 population, whose successful reintroduction will require an adaptive response to an emerging  
47 conservation issue, thiamine deficiency.

48 Evidence is mounting that populations of diverse taxa are becoming increasingly  
49 deficient in thiamine (vitamin B<sub>1</sub>) (Balk et al., 2009, 2016). For example, high rates of mortality  
50 or reduced reproductive success associated with thiamine deficiency have been observed in  
51 invertebrates (Balk et al., 2016), fishes (Futia et al., 2017), reptiles (Honeyfield et al., 2008; Ross  
52 et al., 2009), and birds (Balk et al., 2009). Furthermore, many cases of thiamine deficiency  
53 remain undetected. From a conservation standpoint, it is particularly concerning that thiamine  
54 deficiency remains largely undetected despite potentially being a large driver of population  
55 declines.

56 Thiamine is an essential vitamin that is synthesized by prokaryotes, plants, and fungi;  
57 animals are incapable of producing thiamine and primarily acquire the vitamin through their  
58 diets (Bettendorff, 2013). The physiological manifestations of thiamine deficiency are directly  
59 related to thiamine's roles in bioenergetic, neurological, and cardiovascular pathways. Thiamine  
60 serves as a cofactor for enzymes in metabolism and energy production pathways (*i.e.*, pentose  
61 phosphate pathway and tricarboxylic acid cycle) and thiamine deficiency leads to extreme  
62 lethargy (Brown et al., 2005; Fitzsimons, Brown, Honeyfield, & Hnath, 1999). Thiamine is also  
63 required for production of neurotransmitters, antioxidants, and myelin (Bettendorff, 2013),  
64 consistent with the neurological and behavioral signs of thiamine deficiency, including brain  
65 lesions (Butterworth, 2009; Honeyfield et al., 2008; Lee, Jaroszewska, Dabrowski, Czesny, &  
66 Rinhard, 2009) and uncoordinated movements (Brown et al., 2005; Fisher, Spitzbergen, et al.,  
67 1995; Fitzsimons et al., 2005; Sechi & Serra, 2007). Thiamine deficiency can also impair  
68 cardiovascular function, leading to low blood pressure, irregular heart rate, pulmonary edema,

69 and circulatory collapse (Essa et al., 2011; Sechi & Serra, 2007). Because thiamine plays a  
70 central role in growth, development, and proper neurological function (Bettendorff, 2013),  
71 thiamine deficiency can impair an individual's capacity to forage, avoid predation, and reproduce  
72 (Carvalho et al., 2009; Fisher, Spitzbergen, et al., 1995; Fitzsimons et al., 2009), all of which can  
73 contribute to large reductions in population size (Ketola, Bowser, Wooster, Wedge, & Hurst,  
74 2000; Mörner et al., 2017).

75         The underlying causes of thiamine deficiency vary among taxa and environments. In  
76 fishes, the emergence of thiamine deficiency is largely attributed to diet. For example, thiamine  
77 deficiency has often been observed in salmonids with diets containing alewife (*Alosa*  
78 *pseudoharengus*) and rainbow smelt (*Osmerus mordax*), both of which contain high levels of  
79 thiaminase, a thiamine-degrading enzyme (reviewed in Harder et al., 2018). In the Baltic Sea, the  
80 occurrence of thiamine deficiency in Atlantic salmon (*Salmo salar*) also coincides with the  
81 consumption of fishes with low thiamine:fat content ratios, including Atlantic herring (*Clupea*  
82 *harengus*) and sprat (*Sprattus sprattus*) (Hansson et al., 2001; Keinänen et al., 2012). However,  
83 these fishes also contain thiaminase, making it difficult to establish low thiamine:fat content  
84 ratios as direct, causative agents of thiamine deficiency. For adult salmon returning to spawn, the  
85 most obvious signs of thiamine deficiency are uncoordinated, “wiggling” swimming patterns and  
86 an inability to remain upright in the water column (Fisher, Spitsbergen, Iamonte, Little, &  
87 Delonay, 1995; Fitzsimons et al., 2005). If thiamine deficient individuals are able to spawn, these  
88 behaviors are inevitably mirrored in their offspring. Individuals hatching from thiamine deficient  
89 eggs do not survive for more than a few weeks and exhibit physical signs of deficiency, such as  
90 hemorrhaging and large yolk sacs with opacities and edema, prior to death (Fig. 1A) (Fisher,  
91 Spitsbergen, et al., 1995). The inability of thiamine deficient salmon to successfully reproduce is

92 an emerging conservation and management issue (reviewed in Harder et al., 2018), and impedes  
93 reintroduction efforts throughout their native range.

94         One such reintroduction effort occurs in Lake Champlain (Canada and USA), where  
95 Atlantic salmon were extirpated from the lake in the early 1800s (Marsden & Langdon, 2012; SI  
96 Introduction). Diversifying the forage base or controlling the alewife population in Lake  
97 Champlain could alleviate thiamine deficiency in Atlantic salmon, but efforts to eradicate  
98 invasive species after population establishment are often prohibitively expensive and the  
99 possibility of reinvasion cannot be eliminated (Myers, Simberloff, Kuris, & Carey, 2000).  
100 Alternatively, recent research suggests that Atlantic salmon populations with diets high in  
101 thiaminase may have genetically adapted to low thiamine availability (Houde, Saez, Wilson,  
102 Bureau, & Neff, 2015). This rapid genetic adaptation could be the result of selection on genes  
103 associated with thiamine-dependent pathways. For example, conformational changes in enzymes  
104 requiring thiamine as a cofactor could increase the binding affinity for thiamine or, alternatively,  
105 variation in regulatory sequences could modify the expression of genes involved in thiamine  
106 uptake and intracellular transport. However, the application of supplemental thiamine to all  
107 fertilized eggs reared in the Lake Champlain hatchery precludes selection related to thiamine  
108 deficiency at early life stages, and it is currently unknown whether genetic variation in this  
109 population could support a response to such selection. By coupling thiamine treatments, RNA-  
110 seq, and survival analyses on F1 offspring from 9 families raised in a common environment, we  
111 identified an among-family adaptive response in a thiamine-deficient population of Atlantic  
112 salmon and identified pathways and functions impacted by thiamine deficiency. Categorizing  
113 relationships between gene expression and survivorship patterns revealed two distinct groups of  
114 differentially expressed genes that (1) underlie putatively adaptive responses to thiamine

115 deficiency among families and (2) reflect the treatment effect of thiamine use regardless of  
116 genetic differences. Our results are consistent with a heritable, among-family basis for tolerance  
117 to low thiamine availability.

## 118 **Methods**

### 119 *Study system and experimental crosses*

120 We collected gametes from 35 pairs of adult male and female Atlantic salmon returning to the Ed  
121 Weed Fish Culture Station (Grand Isle, Vermont, USA) across two spawning seasons: 17 pairs in  
122 November 2016 and 18 pairs in November 2017. We immediately froze approximately 50 eggs  
123 from each female on dry ice for total thiamine concentration analysis whereby two, 1-g  
124 biological replicates of unfertilized egg tissue were analyzed via high performance liquid  
125 chromatography (*sensu stricto* Futia et al. 2017). We also performed total thiamine concentration  
126 analyses on 2-g samples of maternal muscle tissue sampled from each female (two samples per  
127 female) during U.S. Fish and Wildlife Service disease testing procedures. We transported  
128 gametes at 4 °C to the White River National Fish Hatchery (Bethel, Vermont, USA), where we  
129 systematically combined milt and eggs to generate 35 families (see SI Methods for crossing  
130 details). We divided fertilized eggs from each family into two groups, placing one group into a  
131 1% thiamine mononitrate solution (hereafter, “treated”) and the other into a control water bath  
132 (hereafter, “untreated”). After 30 minutes, we rinsed all eggs with fresh water and transferred  
133 them to heath trays with one tray per family and treatment combination. We left the eggs  
134 undisturbed until reaching the eyed stage (when individuals exhibit retinal pigmentation,  
135 approximately 50 days post fertilization), at which point we counted and removed inviable eggs.  
136 After the eyed stage was reached, we recorded mortality and removed inviable eggs from all  
137 trays each week. Hatching occurred approximately 75 days post fertilization and we continued to

138 monitor and remove dead individuals from all trays each week for the remainder of the  
139 experiments. We concluded the experiments after surviving fry had absorbed their yolk sacs  
140 (~130 days post fertilization) and just prior to initiation of exogenous feeding.

#### 141 *Sampling for RNA-seq*

142 At 95 days post fertilization, we sampled a total of thirty-six individuals for gene expression  
143 analyses from 9 of the 18 families spawned in 2017. Due to hatchery broodstock quotas for  
144 treated individuals, we were limited to sampling these 9 families. To control for variation in  
145 development, we only sampled from families that were spawned on the same day. We froze  
146 individuals from each family and treatment group in dry cryogenic shipping dewars charged with  
147 liquid nitrogen and shipped them to Purdue University for storage at -80 °C. We subsequently  
148 placed two frozen individuals from each family and treatment group (n = 9 families \* 2  
149 treatments (+/- supplemental thiamine) \* 2 individuals = 36) into 10 volumes of RNAlater-ICE  
150 (Invitrogen) pre-chilled to -80 °C and allowed the samples to reach -20 °C overnight. We then  
151 homogenized samples using a TissueRuptor II (Qiagen) and extracted total RNA from each  
152 homogenate using an RNeasy kit (Qiagen).

#### 153 *Survival analyses*

154 We generated a dose-response curve for egg thiamine concentration and proportion of untreated  
155 individuals in each family surviving at the end of the experiments with the *drc* package (Ritz,  
156 Baty, Streibig, & Gerhard, 2015) in R version 3.5.3 (R Core Team, 2019). We selected the  
157 appropriate model by using the *mselect* function to calculate AIC values, with the two-parameter  
158 log-logistic function having the lowest AIC value. We next calculated effective concentrations of



159 egg thiamine required for 25% and 50% survival ( $EC_{25}$  and  $EC_{50}$ , respectively) from the  
160 resulting logistic curve.

161 For the 9 families used in RNA-seq, we conducted survival analyses to determine  
162 whether treatment affected survival within a family over time and to determine the relative risks  
163 of death associated with belonging to each family according to survivorship of untreated  
164 individuals. We constructed Kaplan-Meier survival distributions for each family and treatment  
165 combination and used a log-rank test to determine whether treatment status significantly affected  
166 survival within each family (Kleinbaum & Klein, 2012). We then compared survival  
167 distributions for untreated individuals from each family against the survival distribution for  
168 untreated individuals from family A (the family with the highest survival rate of all families). We  
169 used Cox proportional hazards regressions to calculate hazard ratio values for all families (Cox,  
170 1972) using the *survival* package (Therneau, 2015) in R. We censored individuals removed for  
171 RNA-seq in the analysis. For each family, the calculated hazard ratio represents the probability  
172 of mortality associated with belonging to that family, compared to family A. We also conducted  
173 a linear regression to test for a relationship between hazard ratio value and egg thiamine  
174 concentration. To meet assumptions of normality, we log-transformed hazard ratio values prior  
175 to all regression analyses.

176 When spawning families for this study, reciprocal crosses were not feasible due to limited  
177 egg and milt availability, therefore, we could not formally test for maternal effects (*sensu*  
178 Christie et al., 2016). However, female size is often correlated with offspring size, and larger  
179 offspring frequently exhibit higher fitness than smaller offspring in a common environment  
180 (reviewed in Marshall, Heppell, Munch, & Warner, 2010). We therefore performed linear  
181 regressions to test for relationships between maternal physical characteristics (*i.e.*, standard

182 length and weight) and proportion of untreated offspring surviving at the end of the experiment.  
183 We also plotted maternal muscle and egg thiamine concentration against proportion of untreated  
184 offspring surviving for the 9 families sampled for RNA-seq. A strong association between  
185 maternal characteristics and untreated offspring survival might indicate that maternal condition  
186 plays a larger role in determining thiamine deficiency outcomes than among-family genetic  
187 variation.

### 188 *RNA-seq and sequence processing*

189 We assessed total RNA concentration and quality on an Agilent BioAnalyzer at the Purdue  
190 Genomics Core Facility, with sample RIN scores ranging from 9.3-10.0. One library was  
191 prepared for each individual using the TruSeq Stranded mRNA protocol (Illumina) and cDNA  
192 was sequenced on an Illumina NovaSeq 6000 to generate an average of 87 million 150 bp paired-  
193 end reads per library (Table S1). We removed adapter sequences and clipped poor quality bases  
194 (quality score < 20) from both ends of reads using Trimmomatic (Bolger, Lohse, & Usadel,  
195 2014) and aligned reads to the annotated Atlantic salmon reference genome (*S. salar*  
196 ICSASG\_v2 assembly, NCBI accession GCA\_000233375.4; Lien et al., 2016) using HISAT2  
197 (Kim, Langmead, & Salzberg, 2015) with the *--downstream-transcriptome-assembly* option and  
198 reporting primary alignments. We next assembled transcripts for each sample using StringTie  
199 (Pertea et al., 2015) default parameters and the Atlantic salmon reference annotation file  
200 (ICSASG\_v2) to guide assembly, and merged sample transcripts using StringTie. A transcript  
201 count matrix was next created with featureCounts (Liao, Smyth, & Shi, 2014), excluding  
202 chimeric fragments (*-C* option) and requiring that both reads in a pair be successfully mapped (*-*  
203 *B* option). By default, featureCounts does not count reads with multiple alignments (*i.e.*, a single

204 read aligned to multiple locations in the reference) or read pairs that overlap multiple features,  
205 and we retained these settings in our analyses.

### 206 *Differential expression analyses: treatment effects*

207 We first made comparisons between treated and untreated individuals using both an *a priori* list  
208 of reference genes and a standard discovery-based gene identification pipeline. We generated a  
209 list of *a priori* genes predicted to be differentially expressed between treated and untreated  
210 samples using 4 criteria: (1) genes associated with thiamine-related biological process gene  
211 ontology (GO) terms (any line containing “thiamine” in Ssal\_ICASG\_v2\_GOAccession.txt  
212 downloaded from SalmoBase (Samy et al., 2017) on June 28, 2018), (2) genes encoding thiamine  
213 diphosphate (TDP) dependent enzymes, (3) genes encoding enzymes that contain a TDP binding  
214 site (NCBI conserved protein domain family “TPP\_enzymes”), and (4) genes included in the *S.*  
215 *salar* thiamine metabolism pathway in the NCBI BioSystems Database (BSID: 1429556).

216 We conducted differential gene expression analyses separately in DESeq2 (Love, Huber,  
217 & Anders, 2014) for: 1. the *a priori* list of predicted differentially expressed genes (DEGs) and  
218 2. the list of all assembled transcripts. We identified DEGs associated with thiamine treatment  
219 status while controlling for the effects of family, and considered genes with an FDR-adjusted *p*-  
220 value ( $p_{\text{adj}} < 0.05$ ) to be differentially expressed. We used the *prcomp* command in R to conduct  
221 a principal component analysis for DEGs identified from the list of all assembled transcripts.

222 Using the count matrix for all samples, we identified modules of co-expressed genes by  
223 calculating pair-wise Pearson correlations between each pair of genes using the WGCNA  
224 package (Langfelder & Horvath, 2008). We set the minimum modules size to 30 genes and  
225 merged correlated modules ( $r^2 > 0.9$ ). Each module comprised genes that showed similar

226 expression patterns across samples within a treatment. Following the approach outlined in  
227 Langfelder and Horvath (2008) we performed the following steps. First, we summarized module  
228 expression using a principal components analysis (PCA) and calculated eigengenes as the first  
229 principal component (PC1) for each module. Second, we used the Pearson correlation to search  
230 for associations between module eigengenes and treatment status, and calculated  $p$ -values for  
231 correlations using a Student's asymptotic test. Finally, we applied a Bonferroni correction to  
232 account for multiple testing.

233 For each module significantly associated with treatment status, we performed a gene  
234 ontology (GO) enrichment analysis to identify which Biological Process GO terms associated  
235 with the DEGs were overrepresented compared to the genome-wide complement of *S. salar* GO  
236 terms ( $p < 0.001$ ). We used the TopGo package in R (Alexa & Rahnenfuhrer, 2016), which is  
237 less biased towards the most general GO terms because it employs a hierarchical methodology,  
238 and chose the 'weight01' algorithm because this method efficiently identifies enriched terms at  
239 all levels of the GO hierarchy while limiting the proportion of false positives (Alexa,  
240 Rahnenfuhrer, & Lengauer, 2006). After identifying overrepresented GO terms in each module,  
241 we created a list of terms unique to each module (all overrepresented terms shared among all 3  
242 modules are provided in Table S2). For each module, we created a list of the top 20 genes ranked  
243 by gene significance (a value calculated in WGCNA that indicates the biological significance of  
244 a module gene with respect to the explanatory variable of interest). We used unique GO terms  
245 associated with the top 20 genes to construct a network of GO terms for each module, and the  
246 *metacoder* package (Foster, Sharpton, & Grünwald, 2017) to visualize networks in R. We pruned  
247 internal nodes from each network for ease of visualization.

248 *Identifying putatively adaptive genes*

249 To identify putatively adaptive genes that could respond to selection imposed by thiamine  
250 deficiency, we generated a transcript count matrix for untreated individuals only. We conducted  
251 differential gene expression analysis on this group in DESeq2 in R with family hazard ratio value  
252 as the explanatory variable. We considered genes with  $p_{\text{adj}} < 0.05$  and with a fold-change  $> 1$   
253 ( $\log_2$  fold-change  $> 0.5$  between the families with the lowest and highest hazard ratio values) to  
254 be putatively adaptive.

255 We further categorized the adaptively expressed genes by whether increasing hazard ratio  
256 (*i.e.*, increasing probability of mortality) was associated with either an increase or a decrease in  
257 gene expression, when analyzed across families. We further filtered genes belonging to each  
258 category by applying a linear regression approach to each gene, with  $\log(\text{hazard ratio})$  as the  
259 explanatory variable and overall gene expression (fragments per million mapped fragments,  
260 FPM) as the response variable. To account for the fact that we sequenced two siblings from each  
261 family, we conducted each regression using 1 randomly selected individual from each family,  
262 and repeated this process 1,000 times per gene. We calculated coefficient means for each gene  
263 and variances in the means as 95% confidence intervals. We discarded genes from further  
264 analyses if the slope of the regression did not differ from 0 or if the adjusted  $r^2$  of the regression  
265 was  $< 0.3$ . For each group of putatively adaptive genes, we performed a gene ontology (GO)  
266 enrichment analysis using the same approach described above. We ranked GO terms by  $p$ -value  
267 for each category and retained the top 50 terms from each group ( $p < 0.001$  for all retained  
268 terms).

269 *Categorizing treatment effects: additive vs. family x treatment interactions*

270 To categorize treatment effects, we first limited our analyses to genes previously identified as  
271 differentially expressed with respect to thiamine treatment (see “Differential expression analyses:  
272 treatment effects” section above). Additive effects occur when the response to the thiamine  
273 treatment was equal across families. When the slopes of both treatment and controls do not differ  
274 from zero across families, this pattern represents a purely environmental response to thiamine  
275 treatment. By contrast, one family may respond to thiamine treatment differently than another,  
276 and this pattern can result in a family x treatment interaction. Using this approach, we can  
277 disentangle among-family (*i.e.*, putatively adaptive) variation in gene expression from both an  
278 additive (purely environmental) response to treatment and a family x treatment interaction. We  
279 calculated regressions separately for each treatment group with log(hazard ratio) as the  
280 explanatory variable and fragments per million mapped fragments (FPM) as the response  
281 variable. We again conducted each regression using 1 randomly selected individual from each  
282 family and treatment combination and repeated this process 1,000 times per gene. We identified  
283 significant differences between the treatment and control groups by comparing the bootstrapped  
284 coefficient estimates for slope and intercept. To approximate a significance cut off of  $\alpha = 0.05$ ,  
285 we identified genes where the mean coefficient estimate +/- 1 standard error (approximated by  
286 83% quantiles; Payton, Greenstone, & Schenker, 2003) between the treatment and control groups  
287 did not overlap. In addition, slopes were considered to not differ from zero if their 95%  
288 confidence intervals included zero. We also categorized genes according to whether or not the  
289 slopes or intercepts of the treated and untreated regression lines differed from one another.

## 290 **Results**

### 291 *Thiamine concentration and survival analyses*

292 In 2016 and 2017, the proportion of untreated individuals surviving within each family varied  
293 widely and ranged from 0 to 0.99 (mean = 0.25, SD = 0.34) (Fig. 1B). Total thiamine  
294 concentrations in unfertilized eggs were also variable and ranged from 0.98 to 12.71 nmol total  
295 thiamine/g unfertilized egg tissue (mean = 3.09 nmol/g, SD = 2.23 nmol/g). Fitting a dose-  
296 response curve to the relationship between egg thiamine concentration (nmol/g) and proportion  
297 of untreated individuals surviving at the end of each experiment resulted in an EC<sub>25</sub> of 2.89  
298 nmol/g and an EC<sub>50</sub> of 5.46 nmol/g (*i.e.*, 5.46 nmol/g of thiamine is required for 50% survival)  
299 (Fig. 1C).

300 Within each of the 9 families sampled for gene expression analyses, Kaplan-Meier  
301 survival distributions for treated and untreated individuals were significantly different (log-rank  
302 test; family A:  $p < 0.01$ , families B-I:  $p < 0.0001$ ), indicating that thiamine treatment  
303 significantly and positively impacted survival over time for all families (Fig. S1). Hazard ratios  
304 ranged from 1 (for reference family A) to 80.12 (family I). Hazard ratio values  $> 1$  indicate that a  
305 higher risk of death is associated with belonging to a particular family (*i.e.*, the risk of death  
306 associated with belonging to family I is 80.12 times greater than the risk of death associated with  
307 belonging to family A).

### 308 *Differential expression analyses: treatment effects*

309 Across all 36 individuals sequenced, the average rate of single concordant alignment for read  
310 pairs per sample was 80.9% and 62.2% of read pairs were successfully assigned to annotated  
311 features with featureCounts (Table S1). The final list of *a priori* genes included 106 unique  
312 genes. Of these genes, 17 were differentially expressed between treated and untreated individuals

313 after controlling for false discovery ( $p_{\text{adj}} < 0.05$ ; Table 1). Three of these genes—which encode  
314 adenylate kinase and reduced folate carrier—are involved in regulating intracellular  
315 concentrations of TDP (Fig. S2). Most of the remaining *a priori* DEGs comprise TDP-dependent  
316 enzymes or kinases that control TDP-dependent enzyme activity (Table 1). Differential  
317 expression analysis conducted using the full list of assembled transcripts resulted in the  
318 identification of 3,616 DEGs after controlling for false discovery ( $p_{\text{adj}} < 0.05$ ; Table S3). A  
319 principal component analysis conducted with these DEGs showed treated samples clustering  
320 closely together, with PC1 differentiating treated and untreated individuals within each family  
321 and describing 59% of the variation (Fig. 2).

#### 322 *Gene co-expression network and gene ontology analyses: treatment effect genes*

323 After Bonferroni correction, 3 WGCNA modules of co-expressed genes were significantly  
324 correlated with treatment status (corrected  $p < 0.05$ ). Module A contained 667 genes and these  
325 genes were associated with 647 significantly overrepresented GO terms; 46 GO terms were  
326 unique to Module A and associated with the top genes in the module when genes were ranked by  
327 gene significance (terminal nodes in Fig. 3A, Table S4). Many GO terms associated with genes  
328 in Module A were related to neurological function and development, including regulation of  
329 long-term neuronal synaptic plasticity, neurotransmitter secretion, and neuromuscular junction  
330 development (Fig. 3A). Differential expression of genes involved in neurological function may  
331 underlie the abnormal locomotion patterns observed in thiamine deficient fry. Module B  
332 contained 355 genes associated with 261 significantly overrepresented GO terms; 17 GO terms  
333 were unique to Module B and associated with the top genes in the module. Of these 17 GO  
334 terms, 8 were associated with metabolism, including positive regulation of insulin secretion,  
335 glutamine metabolic process, and tricarboxylic acid metabolic process (Fig. 3B). Differential



336 expression of genes related to these terms is likely related to diminished metabolic rates in  
337 untreated individuals. Module C contained 470 genes associated with 768 significantly  
338 overrepresented GO terms; 51 GO terms were unique to Module C and associated with the top  
339 genes in the module. Many of these GO terms were related to cardiovascular function and  
340 development, such as oxygen transport, endocardium formation, and blood vessel maturation  
341 (Fig. 3C).

342         Additionally, all three modules contained terms related to vision, including visual  
343 learning, retinal metabolic process, adaptation of rhodopsin mediated signaling, and post-  
344 embryonic camera-type eye development. Differential expression of genes related to these terms  
345 in untreated individuals is likely associated with decreased visual acuity documented in thiamine  
346 deficient fry (Carvalho et al., 2009). Each module also contained DEGs identified through  
347 differential expression analysis (representing 23.4%, 18.3%, and 24.5% of genes in each module,  
348 respectively). The DEGs assigned to module A were downregulated in treated individuals, while  
349 the DEGs assigned to modules B and C were upregulated in treated individuals (Fig. S3).

#### 350 *Putatively adaptive genes*

351 Maternal effects may influence among-family variation in survival and gene expression.  
352 However, we could not identify any maternal characteristics, including maternal thiamine  
353 concentrations, that were associated with survival of untreated offspring. Specifically, maternal  
354 size and weight were not correlated with untreated offspring survival rate (standard length:  $F_{1,32}$   
355 = 0.15,  $p = 0.70$ ; weight:  $F_{1,31} = 0.10$ ,  $p = 0.75$ ), indicating that differences in survival among  
356 families is not simply a function of maternal condition (Fig. 4A,B). Furthermore, for the 9  
357 families sampled for RNA-seq, no relationship appears to exist between maternal muscle or egg  
358 thiamine concentrations and proportion of untreated offspring surviving ( $n = 8$  and  $n = 9$ ,

359 respectively; Fig. 4C,D). Results of linear regressions also indicated that egg thiamine  
360 concentration was not a significant predictor of log(hazard ratio) ( $F_{1,7} = 2.18$ ,  $p = 0.18$ ; Fig. S4).  
361 Although we cannot entirely rule out the influence of maternal effects, these results suggest that  
362 maternal effects are not driving all of the among-family variation in survival.

363 Differential expression analyses conducted using a count matrix for only untreated  
364 individuals ( $n = 18$ ) and with family hazard ratio as the explanatory variable yielded 1,656  
365 DEGs. Of these DEGs, 471 were discarded because the adjusted  $r^2$  of the regressions for these  
366 genes were  $< 0.3$ , and an additional 210 were discarded because the regression slopes did not  
367 significantly differ from 0. The remaining 1,446 putatively adaptive DEGs were divided into 812  
368 genes positively associated with increased risk of mortality (Fig. 5A,C) and 634 genes negatively  
369 associated with increased risk of mortality (Fig 5B,C; Table S5).

370 Adaptively expressed DEGs with positive and negative slopes were associated with 870  
371 and 741 overrepresented GO terms, respectively ( $p < 0.001$ ). Of the top 50 terms associated with  
372 genes in each slope category, 17 terms were shared between the categories (Table S6). Shared  
373 terms were related to a variety of processes, including regulation of transcription, response to  
374 glucose, aging, and oxidation-reduction process. Terms associated with genes with negative  
375 slopes (*i.e.*, genes upregulated in families with high survival) relate to growth and developmental  
376 processes, including cellular proliferation, DNA replication, embryo development, neurogenesis,  
377 and visual perception (Table S6). Genes with positive slopes (*i.e.*, genes upregulated in families  
378 with low survival) were associated with terms that seems to indicate stressful physiological  
379 conditions, including response to hydrogen peroxide, response to hypoxia, response to toxic  
380 substance, and several terms related to toll-like receptor signaling pathways (Table S6).

381 *Additive and treatment x among-family effect genes*

382 The differential expression of 114 genes in response to thiamine treatment was driven entirely by  
383 additive effects, meaning that the response to treatment was equal among families (Fig. 6A). Of  
384 these 114 genes, 84 genes also showed no among-family variation in gene expression, suggesting  
385 that the response to thiamine in this group of genes is entirely environmental (*i.e.*, not genetic).  
386 For 30 additively expressed genes, we also identified significant among-family variation in  
387 expression, suggesting that these genes are both putatively adaptive and additive (*i.e.*, they  
388 respond equally across families) (Fig. 6A,B). For example, expression level of popeye domain-  
389 containing protein 2 (*popdc2*; SI Discussion) decreases with increasing hazard ratio rank for both  
390 treatment groups, with equal slopes between treatments (Fig. 6B).

391 For 597 genes differentially expressed with respect to treatment, the slopes of the  
392 regressions for each treatment group differed, indicating a family x treatment effect. The vast  
393 majority (460/720) of family- and treatment-effect genes fell into two categories (Fig. 6A), both  
394 of which had a shared y-intercept (see Fig. S5 for all identified categories). Gene expression  
395 between treated and untreated individuals was most similar at lower hazard ratio values, with  
396 expression levels of treated and untreated individuals diverging with increasing hazard ratio. For  
397 example, expression levels of the optineurin and gamma-crystallin M2 genes did not differ  
398 between treatments for the family with the highest survival (lowest hazard ratio value) (Fig.  
399 6C,D). These two genes differ in their responses to treatment; thiamine treatment decreases  
400 expression of optineurin in low survival families, whereas treatment increases expression of  
401 gamma-crystallin M2 in low survival families. Because the slopes of the treatment group  
402 regressions differ, treatment does not evenly affect gene expression across families; the families

403 with the lowest survival (highest hazard ratio values) experienced the largest shifts in expression  
404 levels in response to treatment.

## 405 **Discussion**

406 Among all families and across both years, we found a high degree of variation in survival (Fig.  
407 1B) and egg thiamine concentrations, with most females producing eggs that cannot survive  
408 without supplemental treatment (Fig. 1C). The ubiquity of low egg thiamine in these samples is  
409 consistent with extremely limited reproductive success documented in Lake Champlain  
410 tributaries (Prévost, Hill, Grant, Ardren, & Fraser, in press). Treatment with supplemental  
411 thiamine does improve survival outcomes for all families, but does not guarantee survival in  
412 families with higher hazard ratios (Fig. S1D-I). Egg thiamine concentration could not predict  
413 survival (hazard ratio value) for the 9 families included in gene expression analyses (Fig. S4),  
414 and no relationships appear to exist between maternal muscle or egg thiamine concentrations and  
415 proportion of untreated offspring surviving (Fig. 4C,D). Across all families, maternal length and  
416 weight also do not predict offspring survival (proportion surviving; Fig. 4A,B). Because all  
417 offspring were raised in a common environment, the absence of this relationship coupled with  
418 the high variation in among-family survival indicates that family identity (*i.e.*, genetic  
419 background) plays an important role in determining whether an individual will survive thiamine  
420 deficiency. Furthermore, in the face of thiamine deficiency, certain families are better able to  
421 maintain gene expression profiles that approximate expression profiles under thiamine-rich  
422 conditions without the aid of supplemental thiamine (Fig. 6), consistent with a genetic basis for  
423 tolerance to low thiamine availability.

424         Across all families, we found that a large number of genes responded to supplemental  
425 thiamine treatment. Of the genes hypothesized to be differentially expressed between treated and

426 untreated individuals *a priori*, two gene products perform functions that balance relative  
427 intracellular concentrations of thiamine and its various derivatives (see SI text for Discussion;  
428 Fig. S2). From the full list of transcript counts, we identified three modules of co-expressed  
429 genes associated with treatment status (Fig. 3). For each of these modules, clear themes emerged  
430 from their unique lists of overrepresented GO terms. Module A's association with neurological  
431 function and development identified genes related to specific signs of thiamine deficiency in  
432 Atlantic salmon fry, such as uncoordinated swimming patterns, inability to maintain an upright  
433 position in the water column, and absence of avoidance behavior in response to light exposure  
434 (Fisher, Spitsbergen, et al., 1995). These signs of thiamine deficiency may also be related to  
435 other overrepresented terms unique to Module A, including responses to stimuli, such as  
436 phototaxis and negative chemotaxis. Overrepresented terms in Module B identified genes  
437 associated with metabolism, and differential expression of these genes likely underlies slower  
438 rates of development under thiamine deficient conditions, with treated individuals achieving  
439 larger body sizes than untreated individuals of the same age (Fitzsimons et al., 2009). In Module  
440 C, overrepresented terms identified genes related to cardiovascular function and development  
441 and may drive vascular dysfunction observed in untreated individuals, as evidenced by  
442 hemorrhaging, vascular congestion, and irregular heart rate (Fig. 1A; Fisher, Spitsbergen, et al.,  
443 1995). The ubiquity of terms related to vision and eye development shared across all three  
444 modules of co-expressed genes demonstrates the complexity of relationships among genes that  
445 influence proper development of the visual system (*e.g.*, A: visual learning and phototaxis; B:  
446 retinol and retinal metabolic processes; C: post-embryonic camera-type eye development).

447         Differential responses to thiamine deficiency among families comprise 1,446 putatively  
448 adaptive genes. These genes are putatively adaptive because their expression level is directly

449 associated with among-family variation in survival. For example, 812 genes are significantly  
450 upregulated in untreated individuals from high-survival families (Fig. 5A,C). This result suggests  
451 that the increased expression of these genes is associated with higher survival and that these  
452 genes, or the various cis or trans acting regulatory elements that influence their expression, could  
453 respond to selection in a thiamine-poor environment. Of course, these putatively adaptive genes  
454 could also be affected by maternal effects, though survival was not correlated with any maternal  
455 or egg traits that we measured (Fig. 4), heritable epigenetic effects (Le Luyer et al., 2017), or  
456 other environmental factors. Thus, we are not suggesting that all of these genes would underlie  
457 an adaptive response to selection, but rather that this list represents a suite of candidate genes  
458 that would likely respond to selection. The fact that there are so many survival-associated genes  
459 implicated in an among-family response also suggests that there is sufficient underlying genetic  
460 variation in the population to respond to selection. This result, coupled with our survival data,  
461 suggest that this population could adaptively respond to selection in the wild. It is worth noting  
462 that there is no natural reproduction in Lake Champlain and that all released salmon are treated  
463 with supplemental thiamine; this relaxed natural selection could be limiting the successful  
464 reintroduction of salmon into the wild.

465         Of the 3,616 treatment-effect DEGs, 84 displayed evidence of an additive effect of  
466 treatment that was not associated with among-family survival (Fig. 6A). In other words, these 84  
467 genes responded to thiamine treatment equally across families and represent a consistent  
468 environmental response to the treatment condition. The lack of association between among-  
469 family variation in survival and the expression of these genes and the fact that these genes  
470 changed in expression roughly equally across families suggests that the change in expression due  
471 to thiamine is an entirely environmental response. Thus, we would not predict these genes to

472 respond to selection in a thiamine-poor environment. A small subset of putatively adaptive genes  
473 ( $n = 30$ ) exhibited an additive response to treatment across families (*i.e.*, the slopes of the  
474 regressions were non-zero but did not differ with respect to treatment) (Fig. 6A,B; SI  
475 Discussion). By contrast, 597 DEGs were adaptively expressed and provided evidence of a  
476 family x treatment interaction. Most of the genes exhibiting both treatment and family effects  
477 (460/720 or 64%) followed predictable patterns of expression that can be broadly grouped into  
478 two out of six identified categories (Fig 6D; see Fig. S5 for all family x treatment patterns). For  
479 both categories, expression is most similar between treatments in families with high survival and  
480 begins to diverge as survival declines. These results illustrate that treatment can have different  
481 effects on different families. The fact that the majority (64%) of family x treatment-effect genes  
482 occur in the two categories with shared y-intercepts indicates that a successful response to  
483 thiamine-poor conditions involves the maintenance of homeostatic conditions.

#### 484 **Conclusion**

485 Across families, we found no relationship between egg thiamine concentration, maternal traits,  
486 and the risk of mortality due to thiamine deficiency, indicating that among-family genetic  
487 variation plays an important role in determining thiamine deficiency outcomes. Through gene  
488 co-expression network analyses, we determined that many GO terms associated with top DEGs  
489 are consistent with observed behavioral and physical signs of thiamine deficiency. Specifically,  
490 terms related to neurological function and development, metabolism, cardiovascular function,  
491 and visual system development parallel signs of deficiency including uncoordinated swimming  
492 patterns, stunted growth, irregular heart rate, and decreased visual acuity. We also described two  
493 broad categories of gene expression patterns in response to thiamine deficiency: (1) putatively  
494 adaptive genes, which underlie family-level differences in tolerance to low thiamine availability

495 and represent candidate genes likely to respond to selection, and (2) treatment effect genes,  
496 which comprise additive and family x treatment effect responses to changes in available  
497 thiamine. An additive response coupled with no among-family variation in expression identifies  
498 genes that are plastic and respond purely as a function of the treatment condition (i.e., different  
499 environments). Such genes would be useful to identify in scenarios where a response to selection  
500 was not desirable (e.g., captive breeding programs). Family x treatment effect genes, on the other  
501 hand, can be associated with differences in among-family variation in survival, and illustrate that  
502 genetic background can differentially affect patterns of gene expression. More importantly, our  
503 results identified putatively adaptive genes that would likely respond to selection and that are  
504 directly associated with among-family variation in survival. Precisely how much of a response to  
505 selection in the wild could occur remains unknown, but uncovering the adaptive genetic variation  
506 required for a response to selection represents the first step towards the successful management  
507 and conservation species threatened by changing environmental conditions.

## 508 **Acknowledgements**

509 We thank T. Chairvolotti and K. Kelsey of the Vermont Fish and Wildlife Department for  
510 coordination of spawning and gamete collection events. We also thank H. Bouchard, P. Boynton,  
511 S. Frost, T. Jones, E. Lehnert, W. Olmstead, N. Staats, and D. Wong of the US Fish and Wildlife  
512 Service for coordination of spawning events, disease testing of adult salmon and offspring,  
513 collection of mortality data, rearing of offspring, and assistance with all logistical aspects of this  
514 study. Additionally, we thank the Purdue Genomics Core for their sequencing efforts, the  
515 Rinchard lab at the State University of New York College at Brockport for thiamine  
516 concentration analyses, C. Searle for providing code and assistance with survival analyses, and  
517 C. Schraidt and M. Sparks for constructive comments and discussion. This research was funded



518 by the Alton A. Lindsey Graduate Fellowship in Ecology (Purdue University) awarded to AMH  
519 and from support from the Purdue Department of Biological Sciences to MRC. The findings and  
520 conclusions in the article are those of the authors and do not necessarily represent the views of  
521 the U.S. Fish and Wildlife Service.

## 522 References

- 523 Alexa, A., Rahnenfuhrer, J., & Lengauer, T. (2006). Improved scoring of functional groups from  
524 gene expression data by decorrelating GO graph structure. *Bioinformatics*, 22(13), 1600–  
525 1607. doi: 10.1093/bioinformatics/btl140
- 526 Alexa, Adrian, & Rahnenfuhrer, J. (2016). topGO: Enrichment analysis for gene ontology  
527 (Version R package v2.30.1).
- 528 Balk, L., Hägerroth, P.-Å., Åkerman, G., Hanson, M., Tjärnlund, U., Hansson, T., ... Sundberg,  
529 H. (2009). Wild birds of declining European species are dying from a thiamine deficiency  
530 syndrome. *Proceedings of the National Academy of Sciences*, 106(29), 12001–12006.
- 531 Balk, L., Hägerroth, P.-Å., Gustavsson, H., Sigg, L., Åkerman, G., Ruiz Muñoz, Y., ... Hansson,  
532 T. (2016). Widespread episodic thiamine deficiency in Northern Hemisphere wildlife.  
533 *Scientific Reports*, 6, 38821.
- 534 Bernatchez, L. (2016). On the maintenance of genetic variation and adaptation to environmental  
535 change: Considerations from population genomics in fishes. *Journal of Fish Biology*,  
536 89(6), 2519–2556. doi: 10.1111/jfb.13145
- 537 Bettendorff, L. (2013). Thiamine. In *Handbook of Vitamins, Fifth Edition* (pp. 267–324). CRC  
538 Press.
- 539 Bolger, A. M., Lohse, M., & Usadel, B. (2014). Trimmomatic: A flexible trimmer for Illumina  
540 sequence data. *Bioinformatics*, 30(15), 2114–2120. doi: 10.1093/bioinformatics/btu170
- 541 Brown, S. B., Honeyfield, D. C., Hnath, J. G., Wolgamood, M., Marcquenski, S. V., Fitzsimons,  
542 J. D., & Tillitt, D. E. (2005). Thiamine status in adult salmonines in the Great Lakes.  
543 *Journal of Aquatic Animal Health*, 17(1), 59–64.
- 544 Butterworth, R. F. (2009). Thiamine deficiency-related brain dysfunction in chronic liver failure.  
545 *Metabolic Brain Disease*, 24(1), 189–196. doi: 10.1007/s11011-008-9129-y
- 546 Carvalho, P. S. M., Tillitt, D. E., Zajicek, J. L., Claunch, R. A., Honeyfield, D. C., Fitzsimons, J.  
547 D., & Brown, S. B. (2009). Thiamine deficiency effects on the vision and foraging ability  
548 of lake trout fry. *Journal of Aquatic Animal Health*, 21(4), 315–325.
- 549 Christie, M. R., Marine, M. L., Fox, S. E., French, R. A., & Blouin, M. S. (2016). A single  
550 generation of domestication heritably alters the expression of hundreds of genes. *Nature*  
551 *Communications*, 7, 10676. doi: 10.1038/ncomms10676
- 552 Cox, D. R. (1972). Regression models and life tables. *Journal of the Royal Statistical Society.*  
553 *Series B (Methodological)*, 34, 187–220.
- 554 Essa, E., Velez, M. R., Smith, S., Giri, S., Raman, S. V., & Gumina, R. J. (2011). Cardiovascular  
555 magnetic resonance in wet beriberi. *Journal of Cardiovascular Magnetic Resonance*,  
556 13(1), 41. doi: 10.1186/1532-429X-13-41
- 557 Fisher, J. P., Spitsbergen, J. M., Iamonte, T., Little, E. E., & Delonay, A. (1995). Pathological  
558 and behavioral manifestations of the “Cayuga syndrome,” a thiamine deficiency in larval  
559 landlocked Atlantic salmon. *Journal of Aquatic Animal Health*, 7(4), 269–283.
- 560 Fisher, J. P., Spitzbergen, J. M., Getchell, R., Symula, J., Skea, J., Babenzein, M., & Chiotti, T.  
561 (1995). Reproductive failure of landlocked Atlantic Salmon from New York’s Finger  
562 Lakes: Investigations into the etiology and epidemiology of the “Cayuga Syndrome.”  
563 *Journal of Aquatic Animal Health*, 7, 81–94.
- 564 Fitzsimons, J. D., Brown, S. B., Honeyfield, D. C., & Hnath, J. G. (1999). A review of early  
565 mortality syndrome (EMS) in Great Lakes salmonids: Relationship with thiamine  
566 deficiency. *Ambio*, 28, 9–15.

- 567 Fitzsimons, J. D., Brown, S. B., Williston, B., Williston, G., Brown, L. R., Moore, K., ... Tillitt,  
568 D. E. (2009). Influence of thiamine deficiency on lake trout larval growth, foraging, and  
569 predator avoidance. *Journal of Aquatic Animal Health*, 21(4), 302–314.
- 570 Fitzsimons, J. D., Williston, B., Amcoff, P., Balk, L., Pecor, C., Ketola, H. G., ... Honeyfield, D.  
571 C. (2005). The effect of thiamine injection on upstream migration, survival, and thiamine  
572 status of putative thiamine-deficient coho salmon. *Journal of Aquatic Animal Health*,  
573 17(1), 48–58.
- 574 Foster, Z. S. L., Sharpton, T. J., & Grünwald, N. J. (2017). Metacoder: An R package for  
575 visualization and manipulation of community taxonomic diversity data. *PLOS*  
576 *Computational Biology*, 15.
- 577 Franks, S. J., Kane, N. C., O'Hara, N. B., Tittes, S., & Rest, J. S. (2016). Rapid genome-wide  
578 evolution in *Brassica rapa* populations following drought revealed by sequencing of  
579 ancestral and descendant gene pools. *Molecular Ecology*. doi: 10.1111/mec.13615
- 580 Futia, M. H., Hallenbeck, S., Noyes, A. D., Honeyfield, D. C., Eckerlin, G. E., & Rinchar, J.  
581 (2017). Thiamine deficiency and the effectiveness of thiamine treatments through  
582 broodstock injections and egg immersion on Lake Ontario steelhead trout. *Journal of*  
583 *Great Lakes Research*, 43(2), 352–358.
- 584 Hansson, S., Karlsson, L., Ikonen, E., Christensen, O., Mitans, A., Uzars, D., ... Ragnarsson, B.  
585 (2001). Stomach analyses of Baltic salmon from 1959 -1962 and 1994 -1997: Possible  
586 relations between diet and yolk-sac-fry mortality (M74). *Journal of Fish Biology*, 58(6),  
587 1730–1745.
- 588 Harder, A. M., Ardren, W. R., Evans, A. N., Futia, M. H., Kraft, C. E., Marsden, J. E., ...  
589 Christie, M. R. (2018). Thiamine deficiency in fishes: Causes, consequences, and  
590 potential solutions. *Reviews in Fish Biology and Fisheries*, 28(4), 865–886. doi:  
591 10.1007/s11160-018-9538-x
- 592 Honeyfield, D. C., Ross, J. P., Carbonneau, D. A., Terrell, S. P., Woodward, A. R., Schoeb, T.  
593 R., ... Hinterkopf, J. P. (2008a). Pathology, physiologic parameters, tissue contaminants,  
594 and tissue thiamine in morbid and healthy central Florida adult American alligators.  
595 *J. Wildl. Dis.*, 44(2), 280–294.
- 596 Honeyfield, D. C., Ross, J. P., Carbonneau, D. A., Terrell, S. P., Woodward, A. R., Schoeb, T.  
597 R., ... Hinterkopf, J. P. (2008b). Pathology, physiologic parameters, tissue contaminants,  
598 and tissue thiamine in morbid and healthy central Florida adult American alligators  
599 (*Alligator mississippiensis*). *Journal of Wildlife Diseases*, 44(2), 280–294. doi:  
600 10.7589/0090-3558-44.2.280
- 601 Houde, A. L. S., Saez, P. J., Wilson, C. C., Bureau, D. P., & Neff, B. D. (2015). Effects of  
602 feeding high dietary thiaminase to sub-adult Atlantic salmon from three populations.  
603 *Journal of Great Lakes Research*, 41, 898–906.
- 604 Keinänen, M., Uddström, A., Mikkonen, J., Casini, M., Pönni, J., Myllylä, T., ... Vuorinen, P. J.  
605 (2012). The thiamine deficiency syndrome M74, a reproductive disorder of Atlantic  
606 salmon (*Salmo salar*) feeding in the Baltic Sea, is related to the fat and thiamine content  
607 of prey fish. *ICES Journal of Marine Science*, 69(4), 516–528.
- 608 Ketola, H. G., Bowser, P. R., Wooster, G. A., Wedge, L. R., & Hurst, S. S. (2000). Effects of  
609 thiamine on reproduction of Atlantic salmon and a new hypothesis for their extirpation in  
610 Lake Ontario. *Transactions of the American Fisheries Society*, 129(2), 607–612.
- 611 Kim, D., Langmead, B., & Salzberg, S. L. (2015). HISAT: A fast spliced aligner with low  
612 memory requirements. *Nature Methods*, 12(4), 357–360. doi: 10.1038/nmeth.3317

- 613 Kleinbaum, D. G., & Klein, M. (2012). *Survival analysis: A self-learning text* (3rd ed). New  
614 York: Springer.
- 615 Langfelder, P., & Horvath, S. (2008). WGCNA: An R package for weighted correlation network  
616 analysis. *BMC Bioinformatics*, 9(1), 559. doi: 10.1186/1471-2105-9-559
- 617 Le Luyer, J., Laporte, M., Beacham, T. D., Kaukinen, K. H., Withler, R. E., Leong, J. S., ...  
618 Bernatchez, L. (2017). Parallel epigenetic modifications induced by hatchery rearing in a  
619 Pacific salmon. *Proceedings of the National Academy of Sciences*, 114(49), 12964–  
620 12969. doi: 10.1073/pnas.1711229114
- 621 Lee, B.-J., Jaroszewska, M., Dabrowski, K., Czesny, S., & Rinchard, J. (2009). Effects of  
622 vitamin B<sub>1</sub> (thiamine) deficiency in lake trout alevins and preventive treatments. *Journal*  
623 *of Aquatic Animal Health*, 21(4), 290–301.
- 624 Liao, Y., Smyth, G. K., & Shi, W. (2014). featureCounts: an efficient general purpose program  
625 for assigning sequence reads to genomic features. *Bioinformatics*, 30(7), 923–930. doi:  
626 10.1093/bioinformatics/btt656
- 627 Lien, S., Koop, B. F., Sandve, S. R., Miller, J. R., Kent, M. P., Nome, T., ... Davidson, W. S.  
628 (2016). The Atlantic salmon genome provides insights into rediploidization. *Nature*. doi:  
629 10.1038/nature17164
- 630 Love, M. I., Huber, W., & Anders, S. (2014). Moderated estimation of fold change and  
631 dispersion for RNA-seq data with DESeq2. *Genome Biology*, 15(12), 550. doi:  
632 10.1186/s13059-014-0550-8
- 633 Marsden, J. E., & Langdon, R. W. (2012). The history and future of Lake Champlain's fishes and  
634 fisheries. *Journal of Great Lakes Research*, 38, 19–34. doi: 10.1016/j.jglr.2011.09.007
- 635 Marshall, D. J., Heppell, S. S., Munch, S. B., & Warner, R. R. (2010). The relationship between  
636 maternal phenotype and offspring quality: Do older mothers really produce the best  
637 offspring? *Ecology*, 91(10), 2862–2873. doi: 10.1890/09-0156.1
- 638 Mörner, T., Hansson, T., Carlsson, L., Berg, A.-L., Ruiz Muñoz, Y., Gustavsson, H., ... Balk, L.  
639 (2017). Thiamine deficiency impairs common eider (*Somateria mollissima*) reproduction  
640 in the field. *Scientific Reports*, 7(1). doi: 10.1038/s41598-017-13884-1
- 641 Myers, J. H., Simberloff, D., Kuris, A. M., & Carey, J. R. (2000). Eradication revisited: Dealing  
642 with exotic species. *Trends in Ecology & Evolution*, 15(8), 316–320. doi: 10.1016/S0169-  
643 5347(00)01914-5
- 644 Passow, C. N., Henpita, C., Shaw, J. H., Quackenbush, C. R., Warren, W. C., Schartl, M., ...  
645 Tobler, M. (2017). The roles of plasticity and evolutionary change in shaping gene  
646 expression variation in natural populations of extremophile fish. *Molecular Ecology*,  
647 26(22), 6384–6399. doi: 10.1111/mec.14360
- 648 Payton, M. E., Greenstone, M. H., & Schenker, N. (2003). Overlapping confidence intervals or  
649 standard error intervals: What do they mean in terms of statistical significance? *Journal*  
650 *of Insect Science*, 3, 1–6.
- 651 Perteau, M., Perteau, G. M., Antonescu, C. M., Chang, T.-C., Mendell, J. T., & Salzberg, S. L.  
652 (2015). StringTie enables improved reconstruction of a transcriptome from RNA-seq  
653 reads. *Nature Biotechnology*, 33(3), 290–295. doi: 10.1038/nbt.3122
- 654 Prévost, A., Hill, N., Grant, J., Ardren, W., & Fraser, D. (in press). Patterns of reproductive  
655 success among reintroduced Atlantic salmon in two Lake Champlain tributaries.  
656 *Conservation Genetics*, in press.

- 657 Pritchard, J. K., Pickrell, J. K., & Coop, G. (2010). The genetics of human adaptation: Hard  
658 sweeps, soft sweeps, and polygenic adaptation. *Current Biology*, 20(4), R208–R215. doi:  
659 10.1016/j.cub.2009.11.055
- 660 R Core Team. (2019). *R: A language and environment for statistical computing*. Retrieved from  
661 <https://www.R-project.org/>
- 662 Ritz, C., Baty, F., Streibig, J. C., & Gerhard, D. (2015). Dose-response analysis using R. *PLOS*  
663 *ONE*, 10(12), e0146021. doi: 10.1371/journal.pone.0146021
- 664 Ross, J. P., Honeyfield, D. C., Brown, S. B., Brown, L. R., Waddle, A. R., Welker, M. E., &  
665 Schoeb, T. R. (2009). Gizzard shad thiaminase activity and its effect on the thiamine  
666 status of captive American alligators *Alligator mississippiensis*. *Journal of Aquatic*  
667 *Animal Health*, 21(4), 239–248. doi: 10.1577/H08-002.1
- 668 Samy, J. K. A., Mulugeta, T. D., Nome, T., Sandve, S. R., Grammes, F., Kent, M. P., ... Våge,  
669 D. I. (2017). SalmoBase: An integrated molecular data resource for salmonid species.  
670 *BMC Genomics*, 18(1). doi: 10.1186/s12864-017-3877-1
- 671 Sechi, G., & Serra, A. (2007). Wernicke’s encephalopathy: New clinical settings and recent  
672 advances in diagnosis and management. *The Lancet Neurology*, 6(5), 442–455.
- 673 Stockwell, C. A., Hendry, A. P., & Kinnison, M. T. (2003). Contemporary evolution meets  
674 conservation biology. *Trends in Ecology & Evolution*, 18(2), 94–101.
- 675 Therneau, T. (2015). A package for survival analysis in R (Version 2.38). Retrieved from  
676 <https://CRAN.R-project.org/package=survival>
- 677 Uusi-Heikkilä, S., Sävilammi, T., Leder, E., Arlinghaus, R., & Primmer, C. R. (2017). Rapid,  
678 broad-scale gene expression evolution in experimentally harvested fish populations.  
679 *Molecular Ecology*. doi: 10.1111/mec.14179
- 680 van’t Hof, A. E., Campagne, P., Rigden, D. J., Yung, C. J., Lingley, J., Quail, M. A., ...  
681 Saccheri, I. J. (2016). The industrial melanism mutation in British peppered moths is a  
682 transposable element. *Nature*, 534(7605), 102–105. doi: 10.1038/nature17951
- 683 Wellenreuther, M., & Hansson, B. (2016). Detecting polygenic evolution: Problems, pitfalls, and  
684 promises. *Trends in Genetics*, 32(3), 155–164. doi: 10.1016/j.tig.2015.12.004
- 685 Willoughby, J. R., Harder, A. M., Tennessen, J. A., Scribner, K. T., & Christie, M. R. (2018).  
686 Rapid genetic adaptation to a novel environment despite a genome-wide reduction in  
687 genetic diversity. *Molecular Ecology*, 27(20), 4041–4051. doi: 10.1111/mec.14726

## 688 **Data Accessibility Statement**

689 Upon acceptance, code and scripts will be made available at <https://github.com/ChristieLab>, and  
690 aligned reads (Table S1) will be made available via NCBI Sequence Read Archive with  
691 accession numbers provided.

## 692 **Author Contributions**

693 AMH, WRA, and MRC designed the project. AMH and WRA collected gametes. AMH  
694 performed molecular work. AMH and JRW analyzed data. AMH and MRC wrote the paper. All

695 authors read and approved the final manuscript.

**Table 1.** Genes identified as differentially expressed that were hypothesized *a priori* to be implicated in thiamine deficiency. Gene symbols correspond to those used in *S. salar* NCBI assembly GCA\_000233375.4 (Lien et al., 2016). Direction of log<sub>2</sub> fold change values indicate direction of regulation in the treated group relative to the untreated group. Genes without chromosome arm information are located on unplaced scaffolds in the *S. salar* reference assembly.

| Gene symbol  | Gene description                                                                                          | Chromosome arm | Log <sub>2</sub> fold change | FDR corrected <i>p</i> -value |
|--------------|-----------------------------------------------------------------------------------------------------------|----------------|------------------------------|-------------------------------|
| bckdha       | branched chain keto acid dehydrogenase E1, alpha polypeptide                                              | 9qc            | -0.166                       | 1.17E-08                      |
| LOC106600850 | pyruvate dehydrogenase (acetyl-transferring) kinase isozyme 2, mitochondrial-like                         | 3q             | 0.476                        | 6.09E-05                      |
| kad          | adenylate kinase 1-2                                                                                      | 1qb            | 0.185                        | 6.44E-04                      |
| kad          | adenylate kinase                                                                                          | 11qb           | 0.235                        | 1.70E-03                      |
| ilvbl        | ilvB (bacterial acetolactate synthase)-like                                                               | 20qb           | 0.165                        | 1.70E-03                      |
| LOC106581299 | alkaline phosphatase, tissue-nonspecific isozyme-like                                                     | 20qb           | 0.638                        | 1.70E-03                      |
| LOC106583968 | DET1- and DDB1-associated protein 1-like                                                                  | 23             | 0.260                        | 1.70E-03                      |
| LOC106569142 | 2-oxoglutarate dehydrogenase, mitochondrial-like                                                          | 1qb            | -0.268                       | 3.44E-03                      |
| LOC106561658 | probable 2-oxoglutarate dehydrogenase E1 component DHKTD1, mitochondrial                                  | 10qb           | -0.288                       | 1.63E-02                      |
| LOC106587025 | 2-oxoglutarate dehydrogenase, mitochondrial                                                               | 26             | -0.226                       | 1.63E-02                      |
| hacl1        | 2-hydroxyacyl-CoA lyase 1                                                                                 | --             | 0.241                        | 2.20E-02                      |
| LOC106579320 | pyruvate dehydrogenase (acetyl-transferring) kinase isozyme 2, mitochondrial-like                         | 19qb           | -0.489                       | 2.20E-02                      |
| LOC106578452 | pyruvate dehydrogenase (acetyl-transferring) kinase isozyme 3, mitochondrial                              | 19qa           | -0.214                       | 2.28E-02                      |
| LOC106580908 | thiamine transporter 2-like                                                                               | 20qb           | 0.969                        | 2.28E-02                      |
| LOC106560358 | thiamine transporter 2-like                                                                               | 10qa           | 1.862                        | 2.85E-02                      |
| LOC106563967 | dihydropyridine-residue acetyltransferase component of pyruvate dehydrogenase complex, mitochondrial-like | 11qb           | -0.182                       | 3.93E-02                      |
| LOC106575607 | folate transporter 1-like                                                                                 | 17qa           | 0.253                        | 4.36E-02                      |



## 697 Figure Legends

698 **Figure 1.** A) Atlantic salmon fry exhibiting characteristic signs of thiamine deficiency, including  
699 hemorrhaging (indicated by arrows) and edema in the posterior portion of the yolk sac. B)  
700 Proportion of untreated fry surviving to the onset of exogenous feeding for 35 families spawned  
701 in 2016 and 2017. C) Dose-response curve illustrating the relationship between total egg  
702 thiamine concentration (nmol/g) and proportion of untreated fry surviving to yolk sac absorption.  
703 Shaded grey areas highlight families with egg [thiamine] < EC<sub>25</sub> (dark grey) and with egg  
704 [thiamine] > EC<sub>25</sub> but < EC<sub>50</sub> (light grey), where EC<sub>25</sub> and EC<sub>50</sub> equal the effective concentrations  
705 required for 25% and 50% survival, respectively .

706 **Figure 2.** Principal component analysis performed using differentially expressed genes (n =  
707 3,616). Results are presented by family (A-I), such that the four colored points plotted in each  
708 panel are full siblings. PC1 explains 59% of the variation and distinguishes among treated and  
709 untreated samples. Triangles represent treated individuals and circles represented untreated  
710 individuals. Insets are Kaplan-Meier survival distributions for treated (yellow) and untreated  
711 (red) individuals from each family. Inset x-axes represent time in days post fertilization, whereas  
712 the y-axes represent survival probability. Hatch marks on survival distributions indicate censored  
713 individuals (*i.e.*, samples removed for RNAseq sampling or disease testing). Stand-alone survival  
714 distributions are presented in Fig. S1 along with family thiamine concentrations and hazard ratio  
715 values.

716 **Figure 3.** Gene ontology (GO) hierarchy networks constructed using the *metacoder* package in R  
717 for three modules (A, B, and C) of co-expressed genes significantly associated with treatment  
718 status. Included GO terms were unique to each module and were associated with at least one of  
719 the top 20 genes in that module when genes were ranked by WGCNA gene significance. Branch  
720 and node colors indicate the biological process child term to which distal nodes belong, with the  
721 central grey node representing the biological process level of the GO hierarchy. Terms associated  
722 with numbered terminal nodes are provided in Table S4. Terminal nodes marked with an \*  
723 indicate nodes related to a function or process commonly represented in that module network  
724 (*e.g.*, several terminal nodes in Module A are related to neurological function and development).

725 **Figure 4.** No associations were found between maternal characteristics (weight (kg) and  
726 standard length (cm), respectively) and proportion of untreated offspring surviving at the end of  
727 the experiment, when tested with linear regressions (A,B). There also does not appear to be any  
728 relationship between maternal muscle or egg thiamine concentrations (nmol/g) and proportion of  
729 offspring surviving for the 9 families sample for RNA-seq (C,D). In A-D, families sampled for  
730 RNA-seq are indicated by blue points; note that data were unavailable for some families in  
731 panels A-C (*i.e.*, 1 family from panels A and C and 2 families from panel B).

732 **Figure 5.** Relative expression of A) glutathione peroxidase (LOC106583190) and B) ATP-  
733 sensitive inward rectifier potassium channel 12 (LOC106600689) in fragments per million  
734 mapped (FPM) across log(hazard ratio) values. C) The number of putatively adaptive genes



735 positively and negatively associated with increasing risk of mortality. Putatively adaptive genes  
736 positively associated with increasing risk of mortality are largely associated with gene ontology  
737 terms related to physiological stress, whereas genes negatively associated with risk are  
738 associated with terms related to growth and developmental processes (see Table S6).

739 **Figure 6.** A) The number of genes differentially expressed in response to treatment and among-  
740 family differences in 4 categories (from left to right): 1) regression slopes are equal between  
741 treatment groups and expression is equal across families, indicating a purely environmental  
742 effect of treatment on differential gene expression; 2) regression slopes are equal, indicating that  
743 families respond evenly to treatment, but among-family differences suggest putatively adaptive  
744 responses; 3) and 4) expression levels are equal between treatment groups in high-surviving  
745 families with expression patterns diverging in low-surviving families, indicating putatively  
746 adaptive responses. Grey lines in example plots in (A) may represent regression lines for either  
747 treated or untreated individuals. B-D) Genes exhibiting expression patterns represented in (A).  
748 Axes colors correspond to bar colors in (A). Relative expression of B) popeye domain-containing  
749 protein 2 (*popdc2*), C) optineurin (*optn*), and D) gamma-crystallin M2 (LOC106575874) in  
750 fragments per million mapped (FPM) across log(hazard ratio) values.

Figure 1.

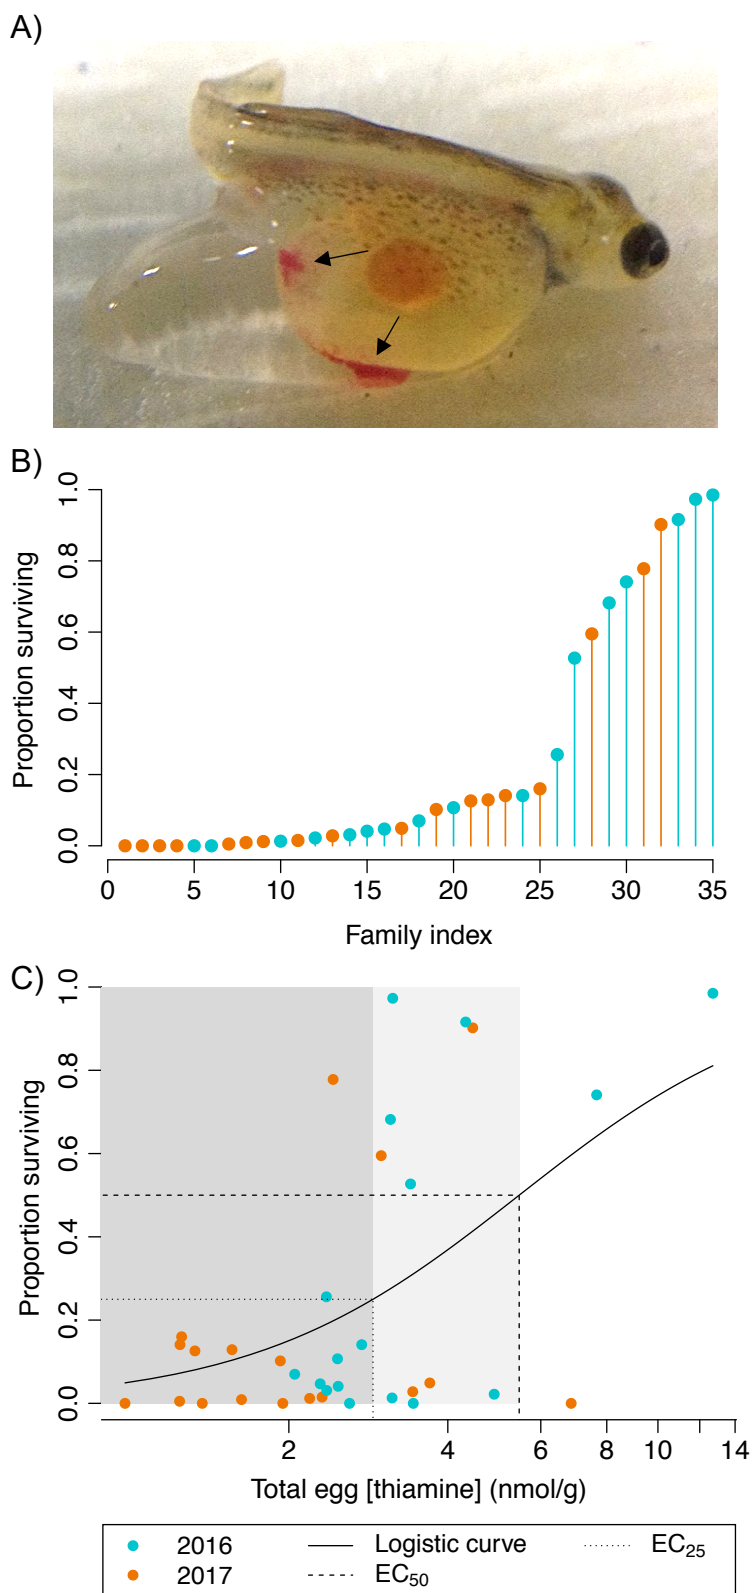

Figure 2.

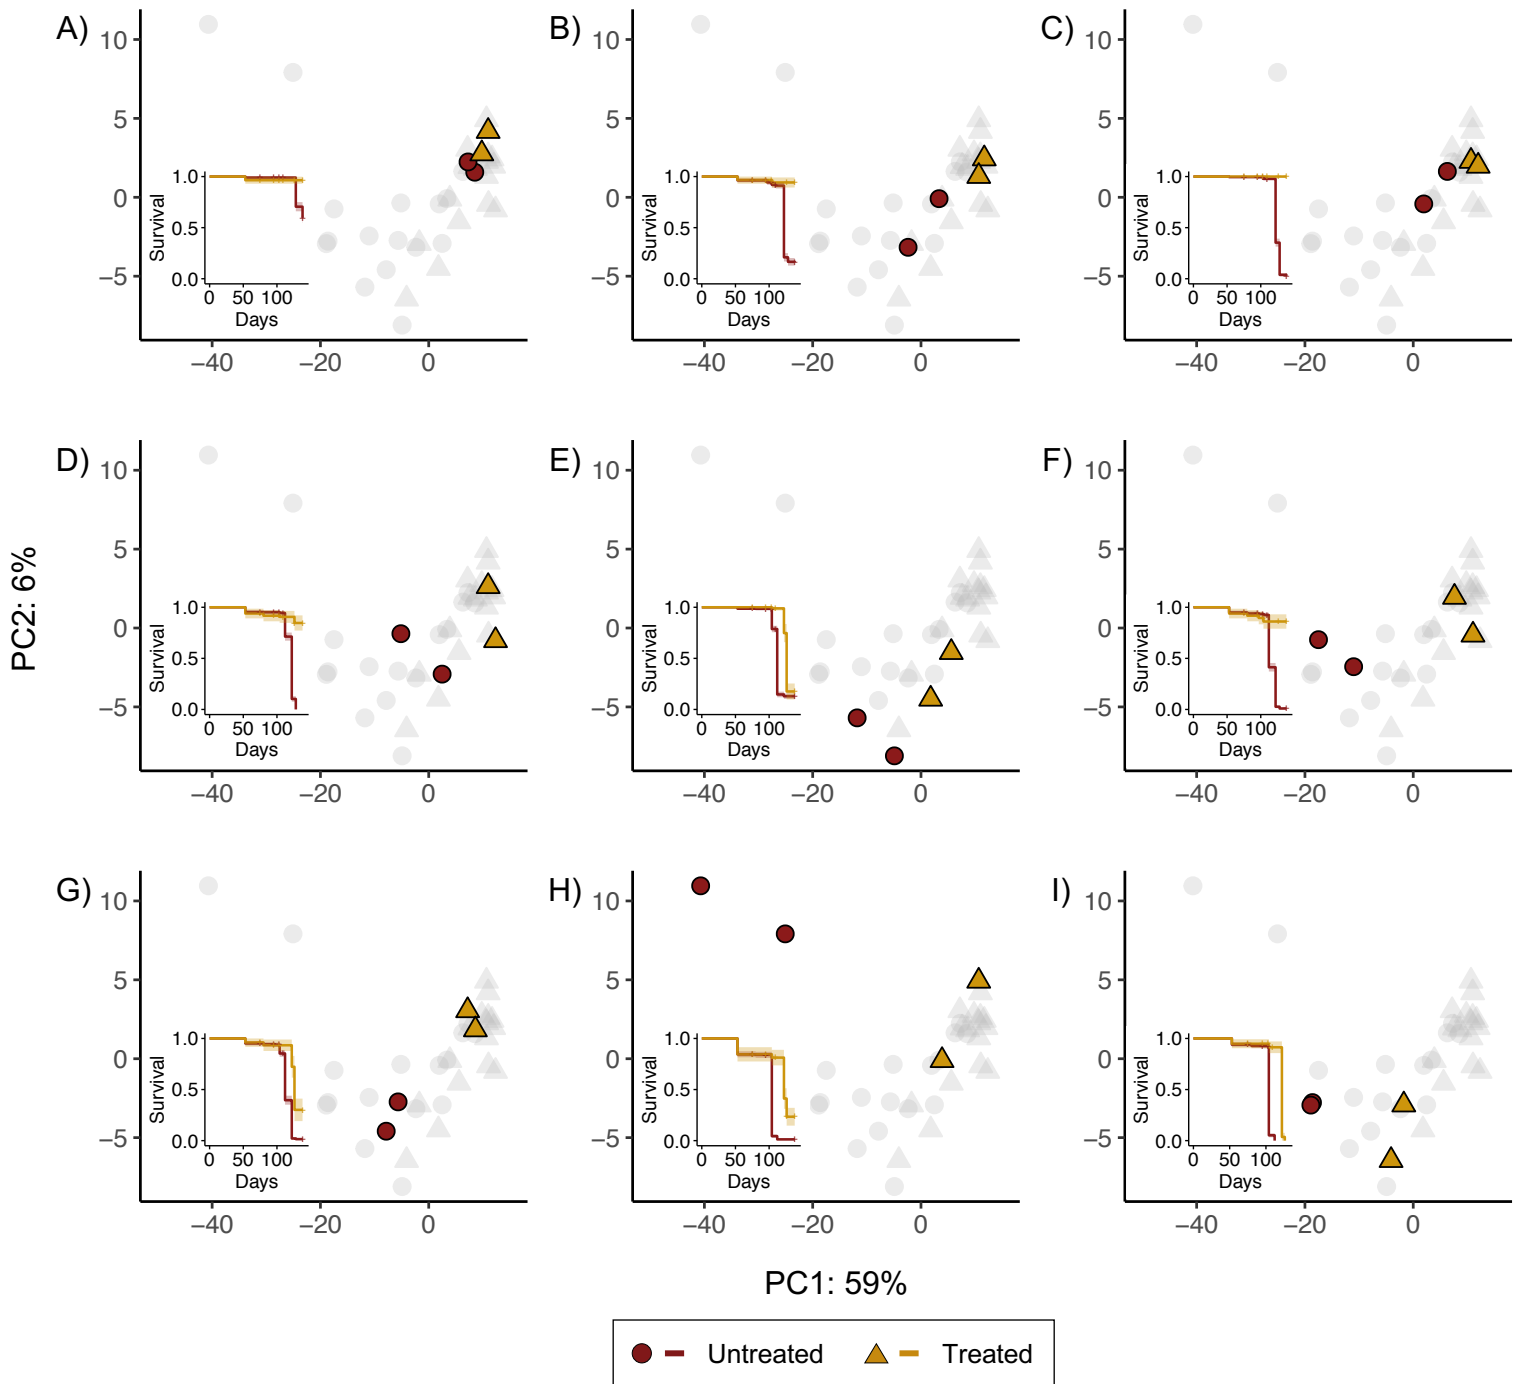

Figure 3.

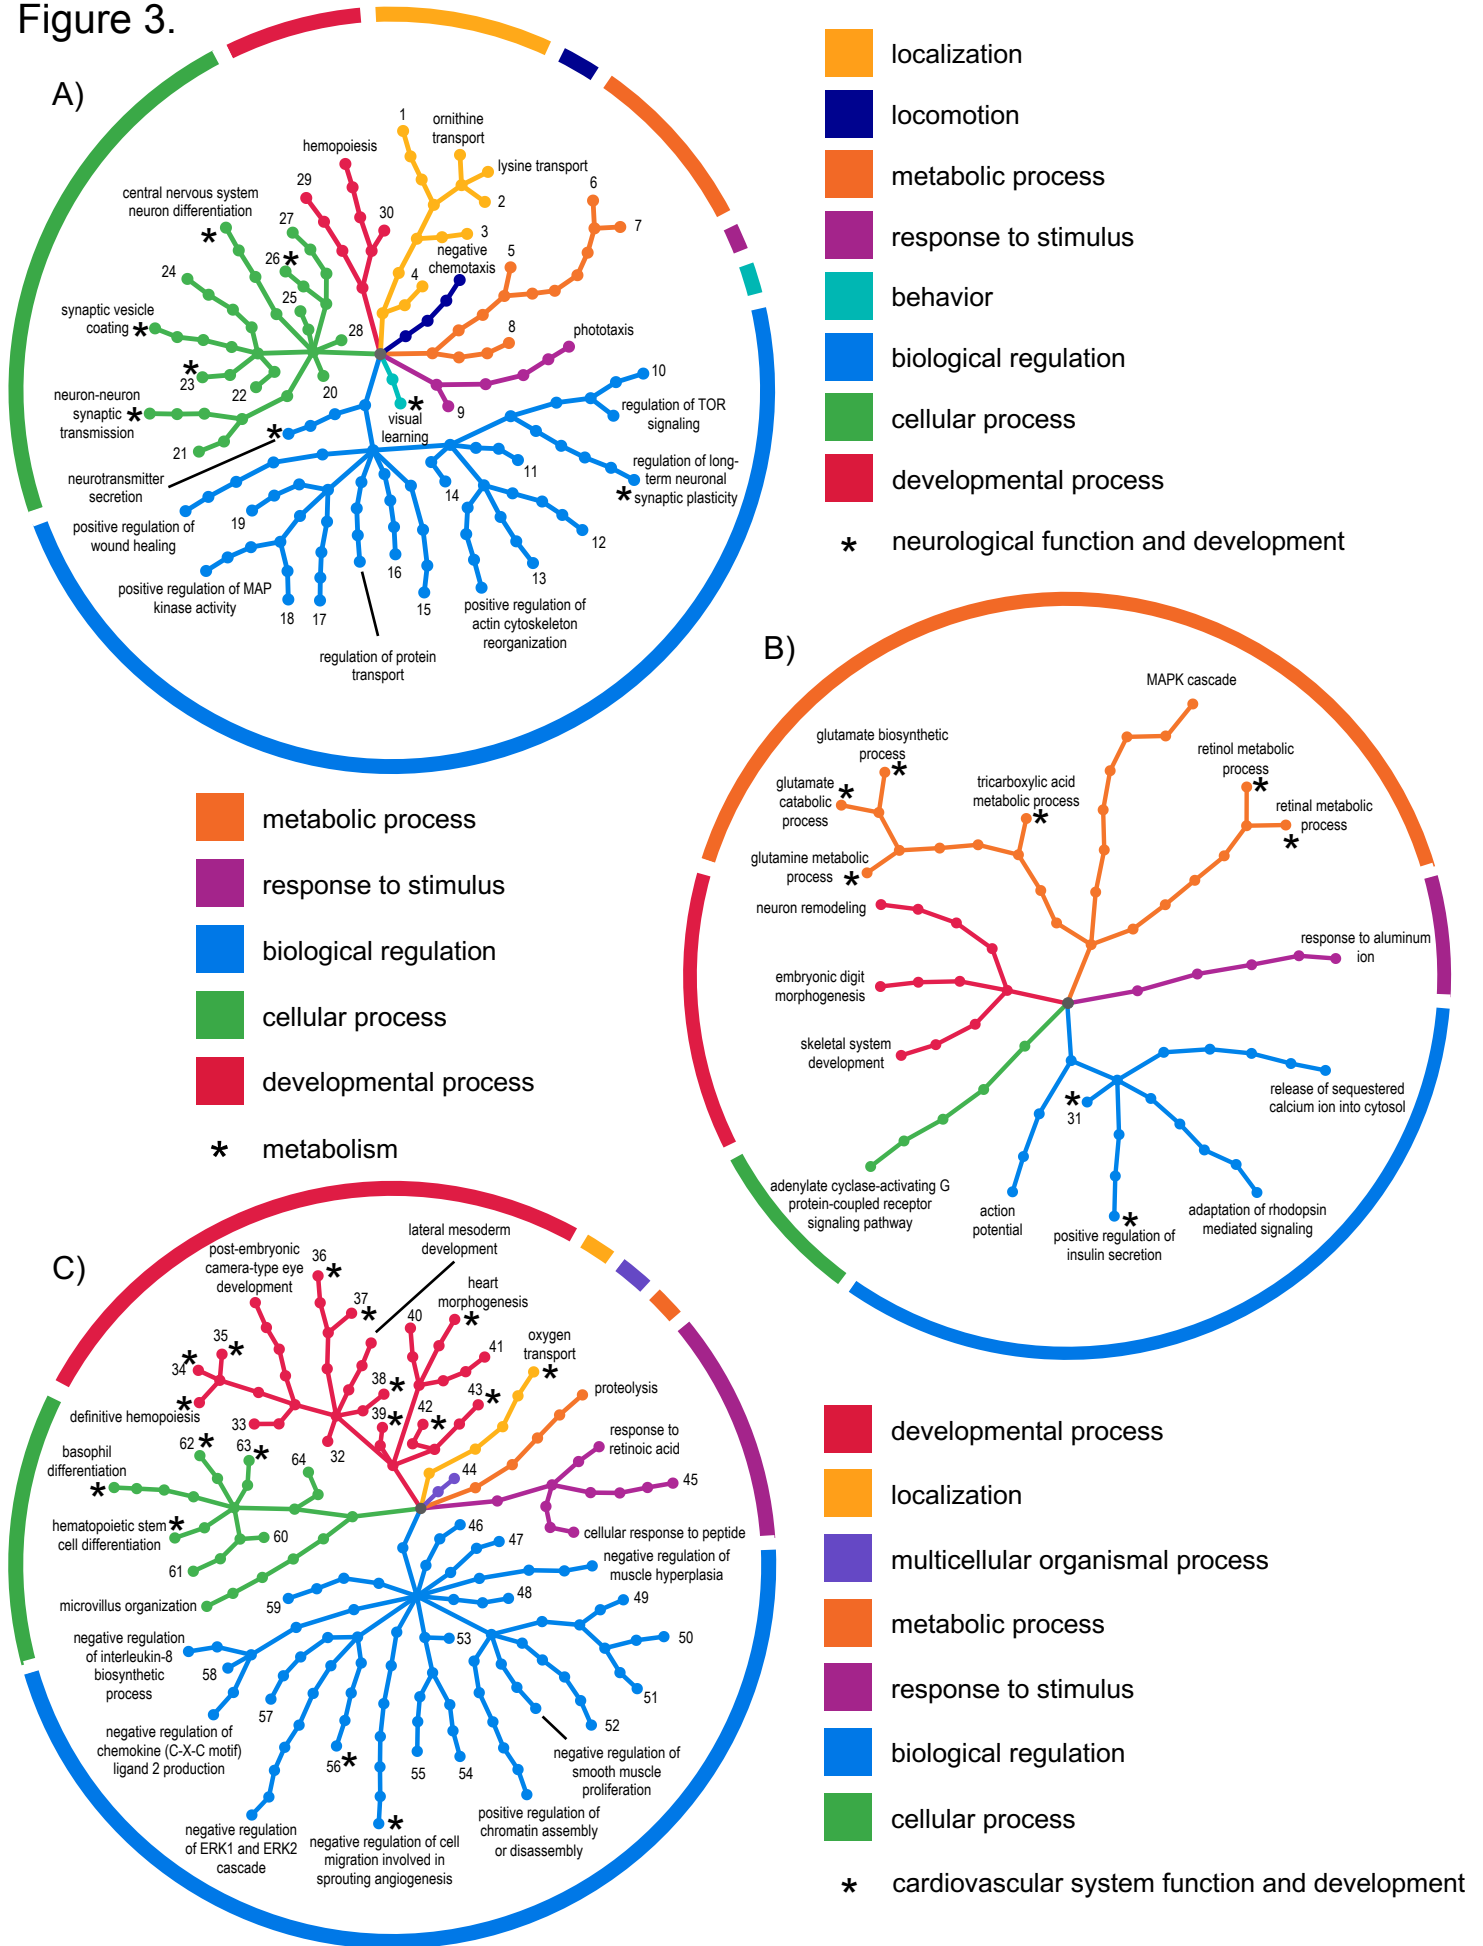

Figure 4.

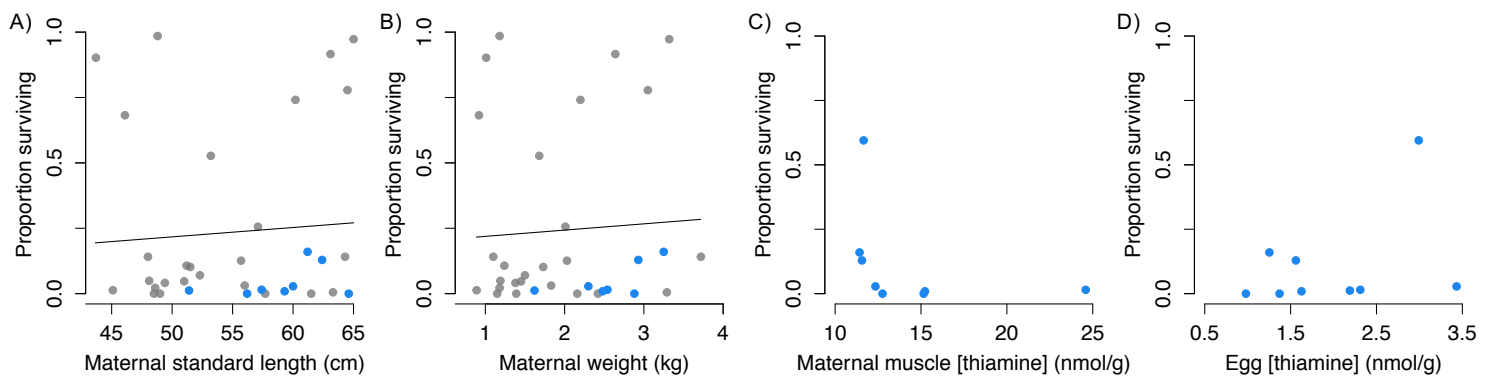

Figure 5.

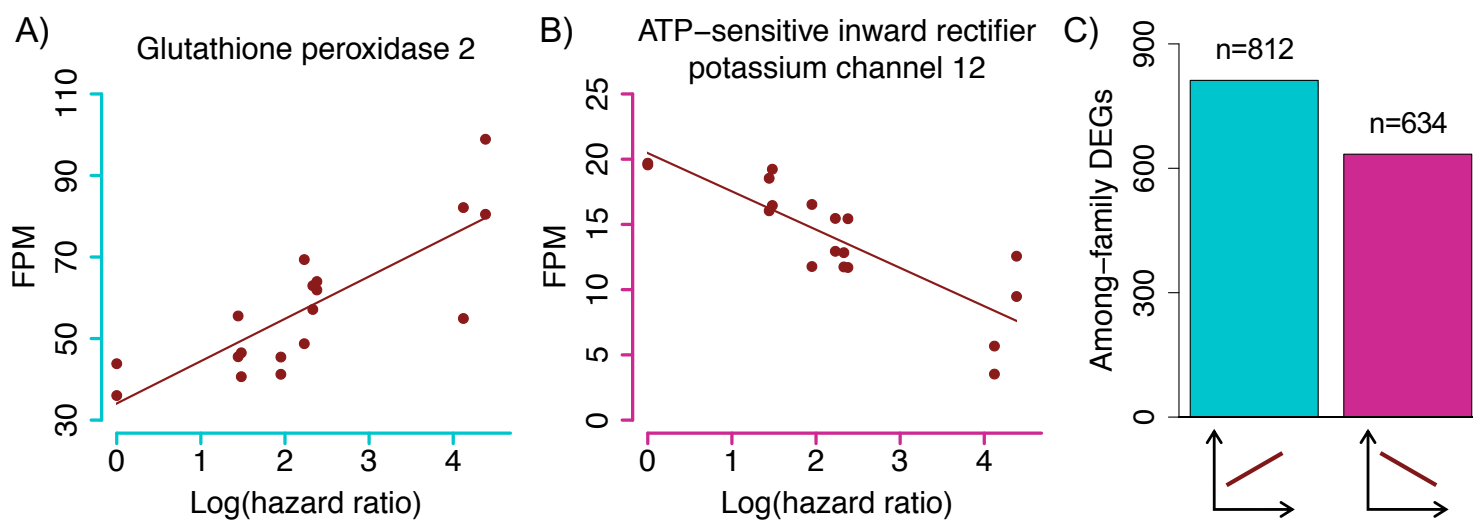

Figure 6.

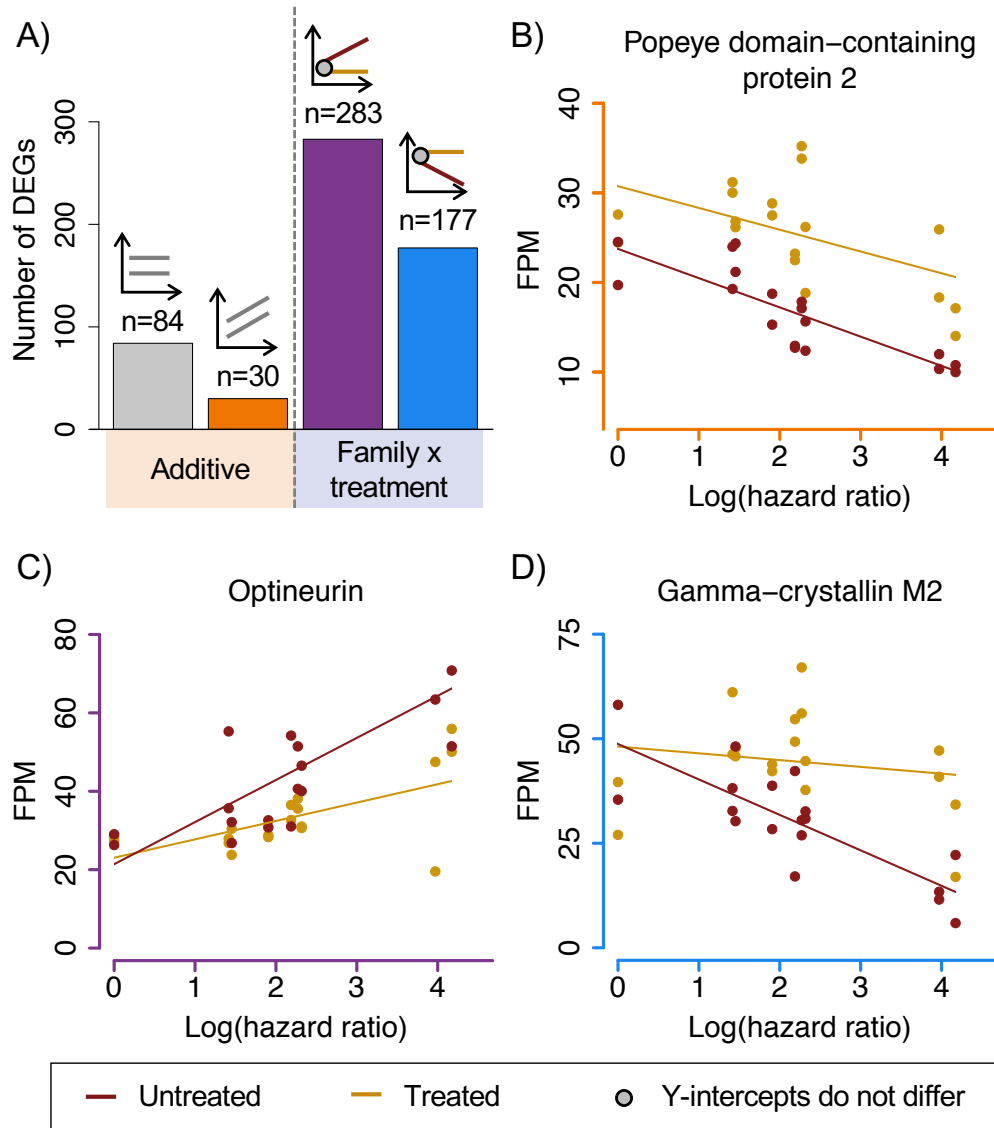

Source: https://www.biorxiv.org/content/10.1101/731497v1.full.pdf
